# Supplementary material
Source: HighWire-hosted journal article supplement (https://bmjopen.bmj.com/content/6/8/e012253)
Supplement: inline-supplementary-material-2 [file inline-supplementary-material-2.pdf]

## Supplementary file 1

### Heart of England Foundation Trust and AKORDD intervention and control areas

The Trust has approximately 1300 beds on three hospital sites, with about 250,000 emergency attendances, and about 65,000 emergency admissions (of all ages) per annum. The relevant details including number of beds on each site are given below. The smallest hospital (Solihull Hospital) in the group and its surrounding postcodes were excluded from the study. The intervention and control hospitals and their respective areas are shown below.

### Birmingham Heartlands Hospital and area (intervention site)

|                                      |                                                                                                        |
|--------------------------------------|--------------------------------------------------------------------------------------------------------|
| Population served in 2011:           | 332000                                                                                                 |
| Bed number (all ages):               | 665 beds                                                                                               |
| Intensive care (level 2 and 3) beds: | 12 level 2 <sup>†</sup> beds, 11 level 3 beds* with facility for continuous renal replacement therapy. |
| On site nephrologists:               | Full time.                                                                                             |
| Dialysis unit:                       | 32 station unit including 11 acute haemodialysis stations.                                             |
| Emergency department:                | ≈ 121, 000 unplanned attendances per annum<br>(financial year 2014/15)                                 |

### Good Hope Hospital and area (control site)

|                                      |                                                                                                                        |
|--------------------------------------|------------------------------------------------------------------------------------------------------------------------|
| Population served in 2011:           | 406300                                                                                                                 |
| Bed number (all ages):               | 440 beds                                                                                                               |
| Intensive care (level 2 and 3) beds: | 12 level 2 <sup>†</sup> / 3 beds (typically 50/50% split), all with facility for continuous renal replacement therapy. |
| On site nephrologists:               | None; visiting nephrologist for clinic and urgent referrals only.                                                      |
| Dialysis unit:                       | None.                                                                                                                  |
| Emergency department:                | ≈ 83, 000 unplanned attendances per annum<br>(financial year 2014/15)                                                  |

\*Intensive care beds only (Thoracic high dependancy beds included)

<sup>†</sup>Does not include Coronary care      Population data from: [http://www.ons.gov.uk/ons/about-ons/business-](http://www.ons.gov.uk/ons/about-ons/business-transparency/freedom-of-information/previous-foi-requests/people--population-and-community/population-for-every-postcode-district-in-england-and-wales/index.html)

[transparency/freedom-of-information/previous-foi-requests/people--population-and-community/population-for-every-postcode-district-in-england-and-wales/index.html](http://www.ons.gov.uk/ons/about-ons/business-transparency/freedom-of-information/previous-foi-requests/people--population-and-community/population-for-every-postcode-district-in-england-and-wales/index.html)

# Allocation of postcodes for AKORDD Birmingham Heartlands Hospital ● East Birmingham

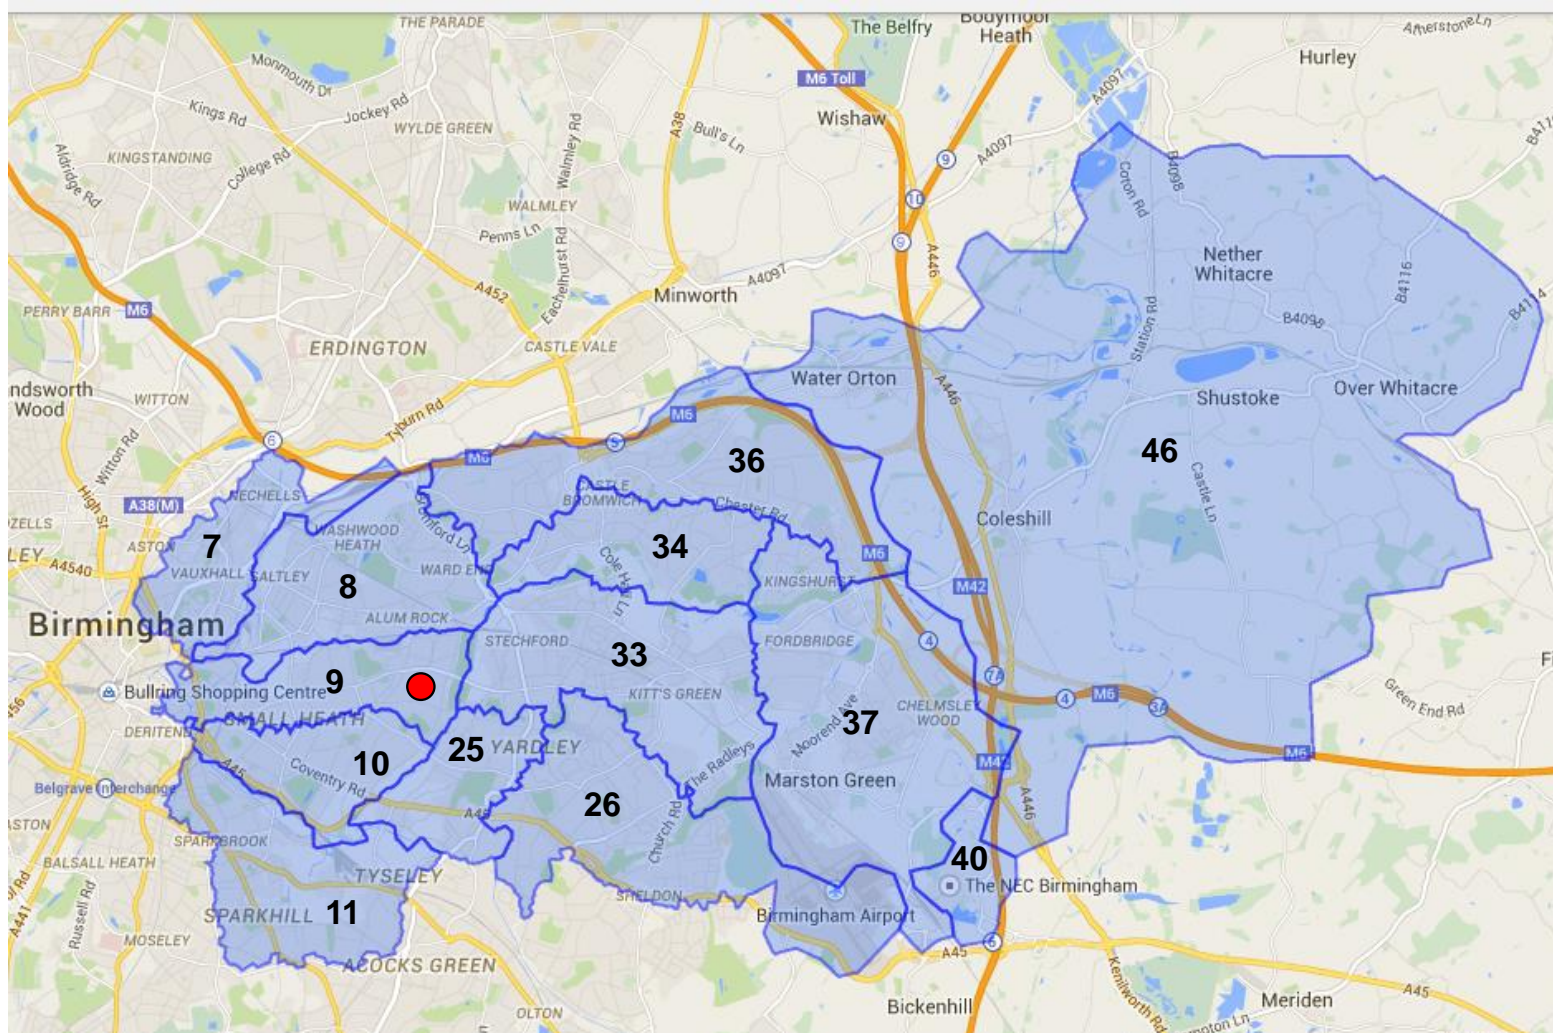

- B7**
- B8**
- B9**
- B10**
- B11**
- B25**
- B26**
- B33**
- B34**
- B36**
- B37**
- B40**
- B46**

Allocation of postcodes for AKORDD  
Good Hope Hospital ● Northeast Birmingham

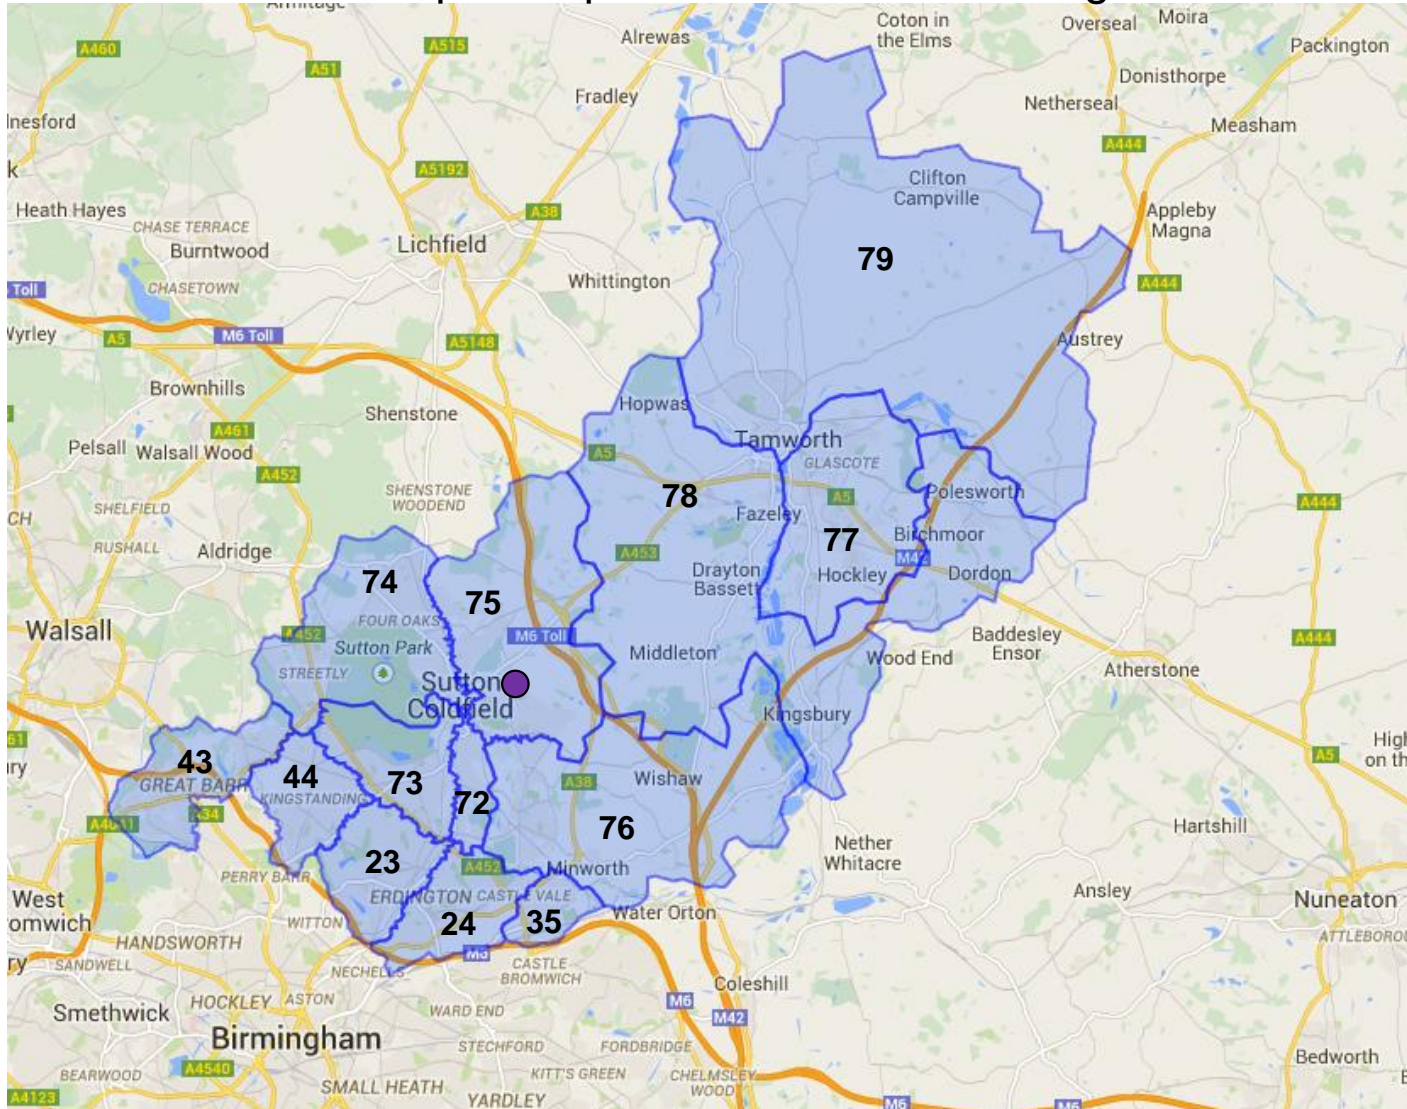

- B23**
- B24**
- B35**
- B43**
- B44**
- B72**
- B73**
- B74**
- B75**
- B76**
- B77**
- B78**
- B79**
